# Supplementary material
Source: MDPI journal article supplement (https://www.mdpi.com/2311-7524/9/10/1138)
Supplement: s1 [file s1]

## Supporting information

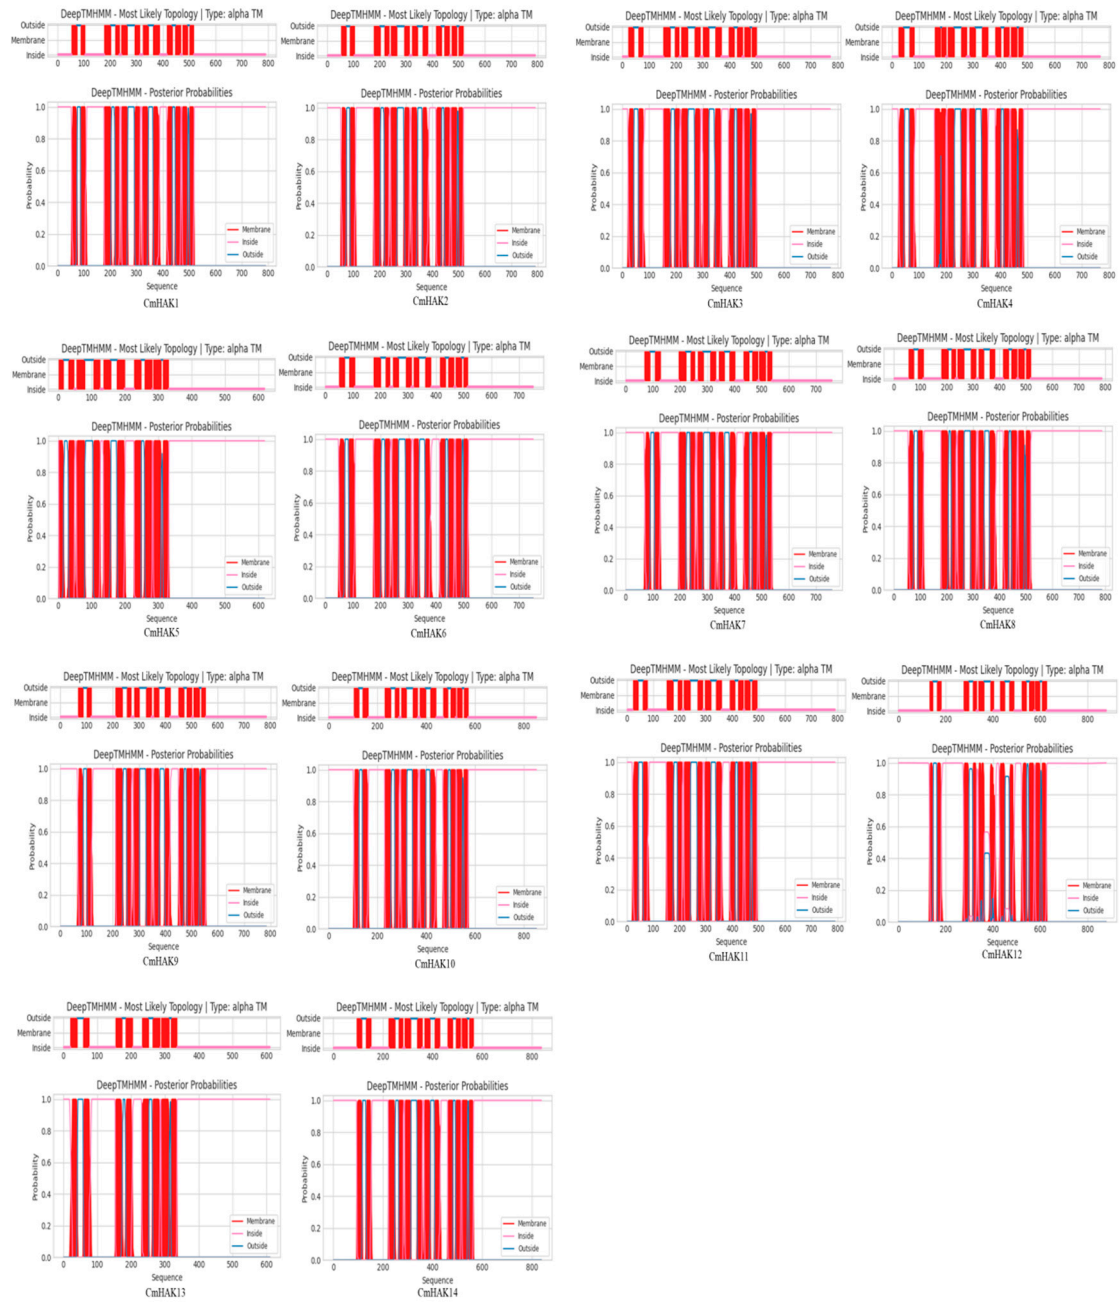

Supplemental Figure S1. Number of predicted TMRs of 14 *CmHAK* proteins in

*Cucumis melo*.

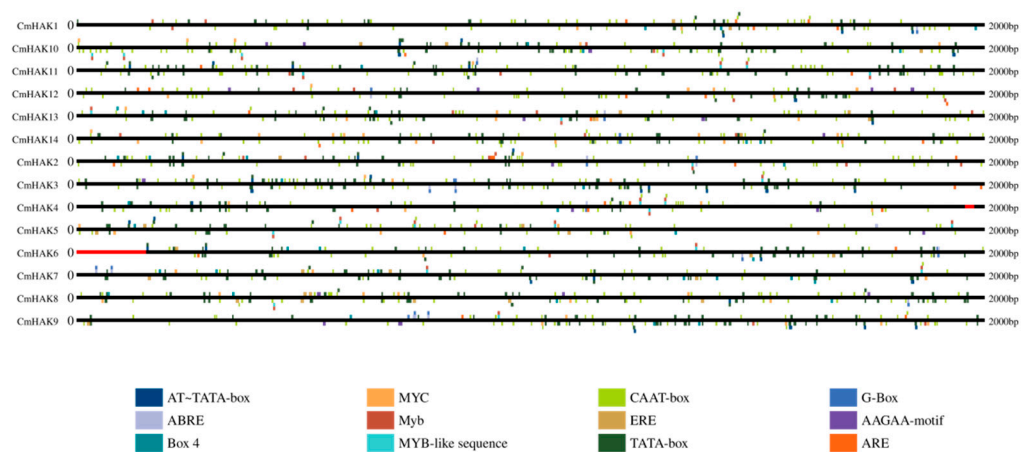

Supplemental Figure S2. Promoter element prediction analysis of *CmHAK* genes.

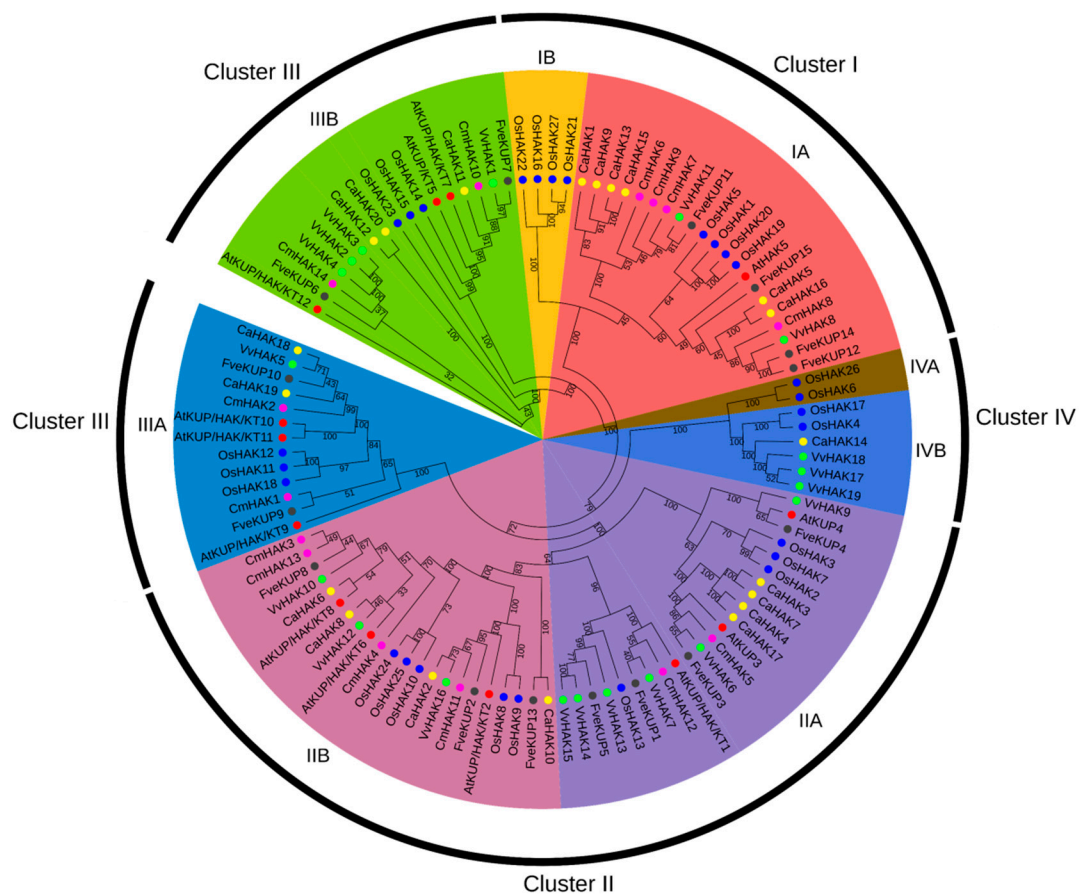

Supplemental Figure S3. Phylogenetic tree of the HAK gene family.

*At*-*Arabidopsis thaliana*; *Os*- *Oryza sativa*; *Fve*- *Fragaria vesca*; *Vv*-*Vitis vinifera*;

*Ca*-*Capsicum annuum*; *Cm*- *Cucumis melo*.
